# Supplementary material for: Clinical Evidence of Biomimetic Hydroxyapatite in Oral Care Products for Reducing Dentin Hypersensitivity: An Updated Systematic Review and Meta-Analysis
Source: MDPI journal article supplement (doi:10.3390/biomimetics8010023), 2023-01-06
Supplement: s1 [file s1]

## PRISMA-S Checklist- Hydroxyapatite and Dentin Hypersensitivity

| Section/topic                          | # | Checklist item                                                                                                                                                                                                                                                     | Location(s) Reported                                                                                                                                                             |
|----------------------------------------|---|--------------------------------------------------------------------------------------------------------------------------------------------------------------------------------------------------------------------------------------------------------------------|----------------------------------------------------------------------------------------------------------------------------------------------------------------------------------|
| <b>INFORMATION SOURCES AND METHODS</b> |   |                                                                                                                                                                                                                                                                    |                                                                                                                                                                                  |
| Database name                          | 1 | Name each individual database searched, stating the platform for each.                                                                                                                                                                                             | OVID Medline/PubMed, Elsevier Scopus, EMBASE, Cochrane Library, Web of Science, Google Scholar                                                                                   |
| Multi-database searching               | 2 | If databases were searched simultaneously on a single platform, state the name of the platform, listing all of the databases searched.                                                                                                                             | University of Toronto Library                                                                                                                                                    |
| Study registries                       | 3 | List any study registries searched.                                                                                                                                                                                                                                | clinicaltrials.gov/ and cochranelibrary.com/central but unpublished studies were not included in the systematic analysis                                                         |
| Online resources and browsing          | 4 | Describe any online or print source purposefully searched or browsed (e.g., tables of contents, print conference proceedings, web sites), and how this was done.                                                                                                   | IADR.org was searched for relevant abstract that would indicate potential publications                                                                                           |
| Citation searching                     | 5 | Indicate whether cited references or citing references were examined, and describe any methods used for locating cited/citing references (e.g., browsing reference lists, using a citation index, setting up email alerts for references citing included studies). | Titles were browsed in all databases. The citations in the reference lists of the full papers retrieved and read and were browsed for citations missed in the literature search. |
| Contacts                               | 6 | Indicate whether additional studies or data were sought by contacting authors, experts,                                                                                                                                                                            | One expert in the dental profession in Canada was                                                                                                                                |

|                          |    |                                                                                                                                                                                           |                                                                                                                                                     |
|--------------------------|----|-------------------------------------------------------------------------------------------------------------------------------------------------------------------------------------------|-----------------------------------------------------------------------------------------------------------------------------------------------------|
|                          |    | manufacturers, or others.                                                                                                                                                                 | contacted about hydroxyapatite used in dentistry                                                                                                    |
| Other methods            | 7  | Describe any additional information sources or search methods used.                                                                                                                       | Contact with dental professionals in Germany revealed several foreign language studies (which were identified in the Scopus search)                 |
| <b>SEARCH STRATEGIES</b> |    |                                                                                                                                                                                           |                                                                                                                                                     |
| Full search strategies   | 8  | Include the search strategies for each database and information source, copied and pasted exactly as run.                                                                                 | See table (Supplement)                                                                                                                              |
| Limits and restrictions  | 9  | Specify that no limits were used, or describe any limits or restrictions applied to a search (e.g., date or time period, language, study design) and provide justification for their use. | The final date of the search was May 1, 2022. All languages were accepted. All open access papers were accepted.                                    |
| Search filters           | 10 | Indicate whether published search filters were used (as originally designed or modified), and if so, cite the filter(s) used.                                                             | No filters were used.                                                                                                                               |
| Prior work               | 11 | Indicate when search strategies from other literature reviews were adapted or reused for a substantive part or all of the search, citing the previous review(s).                          | A database was published in a previous systematic review (Limeback et al, 2021, ref. 18) and cross-checked for citations in dentin hypersensitivity |
| Updates                  | 12 | Report the methods used to update the search(es) (e.g., rerunning searches, email alerts).                                                                                                | Two authors had a previous list of published papers. These provided 3 additional publications found outside of the search                           |
| Dates of searches        | 13 | For each search strategy, provide the date when the last search occurred.                                                                                                                 | May 1, 2022 (all searches)                                                                                                                          |

| <b>PEER REVIEW</b>      |    |                                                                                                                                    |                                                                                                                             |
|-------------------------|----|------------------------------------------------------------------------------------------------------------------------------------|-----------------------------------------------------------------------------------------------------------------------------|
| Peer review             | 14 | Describe any search peer review process.                                                                                           | Peer review of the search was not done externally.                                                                          |
| <b>MANAGING RECORDS</b> |    |                                                                                                                                    |                                                                                                                             |
| Total Records           | 15 | Document the total number of records identified from each database and other information sources.                                  | See Supplement table S2.                                                                                                    |
| Deduplication           | 16 | Describe the processes and any software used to deduplicate records from multiple database searches and other information sources. | Duplicates were found manually and by using key word searches in pdf printouts of lists of papers generated in the searches |

Rethlefsen ML, Kirtley S, Waffenschmidt S, Ayala AP, Moher D, Page MJ, et al. PRISMA-S Group  
PRISMA-S: An Extension to the PRISMA Statement for Reporting Literature Searches in Systematic  
Reviews [17].
