# Supplementary material for: Clinical Evidence of Biomimetic Hydroxyapatite in Oral Care Products for Reducing Dentin Hypersensitivity: An Updated Systematic Review and Meta-Analysis
Source: MDPI journal article supplement (doi:10.3390/biomimetics8010023), 2023-01-06
Supplement: s1 [file s1]

Supplement Table S2: Search Results Details - Dentin Hypersensitivity and Hydroxyapatite

| Search words<br>(up to May 1, 2022)                        | PubMed<br>Result           |                              | SCOPUS<br>Result<br>(all fields) |                              | EMBASE<br>Result           |                              | Web of Science<br>Result   |                              |
|------------------------------------------------------------|----------------------------|------------------------------|----------------------------------|------------------------------|----------------------------|------------------------------|----------------------------|------------------------------|
|                                                            | Number of titles generated | Number of titles re-trrieved | Number of titles generated       | Number of titles re-trrieved | Number of titles generated | Number of titles re-trrieved | Number of titles generated | Number of titles re-trrieved |
| apatite                                                    | 29,254                     |                              | 128,123                          |                              |                            |                              | 33,946                     |                              |
| hydroxyapatite                                             | 34,403                     |                              | 239,333                          |                              | 41259                      |                              | 62,835                     |                              |
| nanohydroxyapatite                                         | 1,371                      |                              | 11,794                           |                              |                            |                              | 1,227                      |                              |
| nano-hydroxyapatite                                        | 1,249                      |                              | 23,679                           |                              | 1775                       |                              | 2,834                      |                              |
| hydroxyapatite + dentin(e)                                 | 1,188                      |                              | 12,675                           |                              | 680                        |                              | 1,408                      |                              |
| nano-hydroxyapatite + dentin(e)                            | 57                         |                              | 1,650                            |                              |                            |                              | 74                         |                              |
| “hydroxylapatite”                                          | 19,011                     |                              | 26,910                           |                              | 3,775                      |                              | 4,280                      |                              |
| “hydroxylapatite” + dentin(e)                              | 502                        |                              | 1,342                            |                              | 39                         |                              | 32                         |                              |
| sensitivity + dental                                       | 26,383                     |                              | 92,113                           |                              | 9,909                      |                              | 22,560                     |                              |
| “randomized clinical trial”                                | 35,178                     |                              | 698,043                          |                              | 46,525                     |                              | 51,444                     |                              |
| “randomized clinical trial” + hydroxyapatite               |                            | 50                           |                                  | 4,995                        |                            | 39                           |                            | 81                           |
| “randomized clinical trial” + hydroxyapatite + sensitivity |                            | 11                           |                                  | 591                          |                            | 8                            |                            | 10                           |
| “in vivo” + hydroxyapatite + sensitivity                   |                            | 123                          |                                  | 7,578                        |                            | 67                           |                            | 53                           |
| “in vivo” + hydroxyapatite + sensitivity, dentin           |                            | 10                           |                                  | 901                          |                            | 7                            |                            | 4                            |
| sensitivity + dental + hydroxyapatite                      |                            | 264                          |                                  | 4,513                        |                            | 124                          |                            | 127                          |
| (hyper)sensitivity + dentin(e) + hydroxyapatite            |                            | 147                          |                                  | 1,056                        |                            | 116                          |                            | 134                          |

|                                                     |        |     |        |       |        |     |       |     |
|-----------------------------------------------------|--------|-----|--------|-------|--------|-----|-------|-----|
| (hyper)sensitivity + nanohydroxyapatite             |        | 129 |        | 232   |        | 14  |       | 44  |
| (hyper)sensitivity + dentin(e) + nanohydroxyapatite |        | 35  |        | 175   |        | 12  |       | 38  |
| toothpaste                                          | 6,132  |     | 21,748 |       | 10,398 |     | 5,123 |     |
| hydroxyapatite + toothpaste                         |        | 174 |        | 2,322 |        | 232 |       | 232 |
| hydroxyapatite + toothpaste + sensitivity           |        | 48  |        | 547   |        | 42  |       | 30  |
| hydroxyapatite + toothpaste + hypersensitivity      |        | 37  |        | 600   |        | 38  |       | 62  |
| nanohydroxyapatite + toothpaste + sensitivity       |        | 20  |        | 82    |        | 2   |       | 29  |
| dentifrice                                          | 7,912  |     | 14,678 |       | 2,490  |     | 3,286 |     |
| hydroxyapatite + dentifrice                         |        | 165 |        | 2,131 |        | 59  |       | 143 |
| hydroxyapatite + dentifrice + sensitivity           |        | 43  |        | 558   |        | 11  |       | 21  |
| hydroxyapatite + dentifrice + hypersensitivity      |        | 32  |        | 557   |        | 9   |       | 36  |
| mouthwash                                           | 18,571 |     | 20,156 |       | 6,792  |     | 3,481 |     |
| hydroxyapatite + mouthwash                          |        | 218 |        | 1,091 |        | 67  |       | 42  |
| hydroxyapatite + mouthwash + sensitivity            |        | 30  |        | 220   |        | 6   |       | 2   |
| hydroxyapatite + mouthwash + hypersensitivity       |        | 7   |        | 161   |        | 7   |       | 4   |
| hydroxyapatite + gels(s)                            | 3,801  |     | 68,720 |       | 1,626  |     | 5,192 |     |
| hydroxyapatite + gels(s) + sensitivity + dentin     |        | 241 |        | 606   |        | 1   |       | 9   |
| nanohydroxyapatite + gel(s) + sensitivity           |        | 7   |        | 450   |        | 3   |       | 7   |
| hydroxyapatite + gels(s) +                          |        | 23  |        | 937   |        | 26  |       | 29  |

|                                                                                                                                      |        |       |  |        |  |     |  |       |
|--------------------------------------------------------------------------------------------------------------------------------------|--------|-------|--|--------|--|-----|--|-------|
| hypersensitivity                                                                                                                     |        |       |  |        |  |     |  |       |
|                                                                                                                                      |        |       |  |        |  |     |  |       |
| hydroxyapatite + cream(s)                                                                                                            |        | 14    |  | 941    |  | 32  |  | 25    |
| nanohydroxyapatite + cream(s)                                                                                                        |        | 3     |  | 89     |  | 5   |  | 2     |
|                                                                                                                                      |        |       |  |        |  |     |  |       |
| hydroxyapatite + chewing gum                                                                                                         |        | 17    |  | 598    |  | 26  |  | 43    |
| hydroxyapatite + chewing gum<br>+ sensitivity                                                                                        |        | 2     |  | 111    |  | 4   |  | 0     |
|                                                                                                                                      |        |       |  |        |  |     |  |       |
| Publications identified                                                                                                              |        | 1,850 |  | 32,042 |  | 957 |  | 1,207 |
| Publications identified in total<br>from primary databases                                                                           | 35,056 |       |  |        |  |     |  |       |
| Additional publications<br>identified from other sources<br>(Google Scholar; citation<br>searching)                                  | 4,490  |       |  |        |  |     |  |       |
| Total relevant full publications<br>included, retrieved and read in<br>full after removing duplicates<br>and irrelevant publications | 44     |       |  |        |  |     |  |       |

Supplement Table S2 shows the detailed results of the database search and the keywords used in that search. The rows shaded in grey indicate the quantitative results of titles retrieved using the search word combinations. Titles and abstracts were used to remove irrelevant publications for inclusion in the systematic review. The total is shown at the end of the table (44 publications were selected and their full texts extracted).
