# Supplementary material for: Clinical Evidence of Biomimetic Hydroxyapatite in Oral Care Products for Reducing Dentin Hypersensitivity: An Updated Systematic Review and Meta-Analysis
Source: MDPI journal article supplement (doi:10.3390/biomimetics8010023), 2023-01-06
Supplement: s1 [file s1]

Supplement Table S1. Summary of recent systematic reviews of dentin hypersensitivity that included hydroxyapatite (HAP)

| Study authors                   | End date of search | Databases searched                                                                       | Total RCTs included    | Active ingredients investigated                                                                              | RCTs of in-office treatments included ? | RCTs of treating DH during vital bleaching included? | RCTs of DH after periodontal therapy included ? | Meta-analysis reported ? | Number of HAP trials included | Authors' Conclusions                                                                                                                                                                                                                                                                         |
|---------------------------------|--------------------|------------------------------------------------------------------------------------------|------------------------|--------------------------------------------------------------------------------------------------------------|-----------------------------------------|------------------------------------------------------|-------------------------------------------------|--------------------------|-------------------------------|----------------------------------------------------------------------------------------------------------------------------------------------------------------------------------------------------------------------------------------------------------------------------------------------|
| Mora-schini et al., 2018<br>[8] | Mar. 2017          | Medline (PubMed), Cochrane Library                                                       | 21                     | Laser, fluoride (gel, varnish, DSF), potassium, DSP, arginine, n-HAP                                         | yes                                     | yes                                                  | yes                                             | yes                      | 3                             | "There was no significant difference in the direct comparison between the treatment groups. For in-home treatments, only chemical occlusion of dentin tubules and nerve desensitization showed a greater treatment efficacy than placebo, and the difference was statistically significant." |
| Hu et al., 2018<br>[9]          | Nov. 2017          | PubMed, EMBASE, Web of Science, Cochrane CENTRAL, Chinese Biomedical Literature Database | 53                     | KNO <sub>3</sub> , KCl, SrCl <sub>2</sub> , SnF <sub>2</sub> , CSPA, Arginine/CaCO <sub>3</sub> , ACP, n-HAP | no                                      | no                                                   | no                                              | yes                      | 2                             | "Desensitizing toothpastes containing potassium, stannous fluoride, potassium and strontium, potassium and stannous fluoride, calcium sodium phosphosilicate, arginine, and nano-hydroxyapatite are effective in relieving DH"                                                               |
| Gul et al., 2021                | 2018               | PubMed, Science Direct, Web of Science                                                   | 16 (includes in vitro) | HAP compared to positive controls (NovaMin,                                                                  | no                                      | no                                                   | no                                              | no                       | 7                             | "Clinical trials (...) reported reduction in DH in patients following 2-8 weeks of                                                                                                                                                                                                           |

|                                      |           |                                                                                    |          |                                                                                                                                                                                |     |     |     |                  |    |                                                                                                                                                                                                                                 |
|--------------------------------------|-----------|------------------------------------------------------------------------------------|----------|--------------------------------------------------------------------------------------------------------------------------------------------------------------------------------|-----|-----|-----|------------------|----|---------------------------------------------------------------------------------------------------------------------------------------------------------------------------------------------------------------------------------|
| [10]                                 |           |                                                                                    | studies) | ProArgin, KNO <sub>3</sub> )                                                                                                                                                   |     |     |     |                  |    | usage.”                                                                                                                                                                                                                         |
| De Melo Alencar et al., 2019<br>[11] | Apr. 2018 | PubMed, Web of Science, Cochrane CENTRAL, Scopus, LILACS, ClinTrials.gov, OpenGrey | 8        | n-HAP compared to positive controls                                                                                                                                            | no  | no  | no  | yes              | 8  | “The n-HAP-containing treatment showed better clinical performance than other treatments for DH relief.”                                                                                                                        |
| Marto et al., 2019<br>[12]           | Nov. 2018 | Medline/PubMed EMBASE, Cochrane Library, ClinicalTrials                            | 66       | Potassium, fluoride, strontium, oxalates, iontophoresis, arginine, glutaraldehyde + HEMA, chlorhexidine, HAP, herbal, ozone, composite resins, adhesives, GIC, sealants, laser | yes | yes | yes | no               | 20 | “For long-time effects, at-home treatments with chemical agents, such as potassium nitrate, arginine or hydroxyapatite, can also be used to treat DH with significant results.”                                                 |
| Hu et al., 2019<br>[13]              | Dec. 2018 | Medline, EMBASE, Web of Science, Cochrane CENTRAL                                  | 30       | KNO <sub>3</sub> , KCl, SrCl <sub>2</sub> , SnF <sub>2</sub> , CSPS, Arginine/ CaCO <sub>3</sub> , ACP, n-HAP                                                                  | no  | no  | no  | yes<br>(Network) | 2  | “n-HA containing toothpastes may be the best desensitizing toothpaste for the treatment of DH.”                                                                                                                                 |
| Martins et al., 2020<br>[14]         | Feb. 2019 | Medline, EMBASE, Cochrane CENTRAL                                                  | 90       | >300 comparisons involving fluoride, CSP, SnF <sub>2</sub> , TCP, arginine, SrCl <sub>2</sub> , Herbal, KNO <sub>3</sub> , n-HAP                                               | no  | no  | no  | yes<br>(Network) | 1  | “Most toothpaste formulations showed evidence of superiority against placebo or fluorides (amine fluoride, MFP, or NaF) alone in managing all forms of DH (high to moderate certainty). Strontium and potassium showed moderate |

|                               |           |  |                         |                                     |    |    |    |    |   |                                                                                                                                                                                                                        |
|-------------------------------|-----------|--|-------------------------|-------------------------------------|----|----|----|----|---|------------------------------------------------------------------------------------------------------------------------------------------------------------------------------------------------------------------------|
|                               |           |  |                         |                                     |    |    |    |    |   | effectiveness for tactile stimulus and arginine for air stimulus. The combination of potassium with SnF <sub>2</sub> or hydroxyapatite was effective for tactile and air stimuli with moderate certainty of evidence." |
| Ouben-yahya, 2021<br><br>[15] | May. 2021 |  | 7 (double blinded RCTs) | HAP vs placebo or positive controls | no | no | no | no | 7 | "No conclusion of superiority of n-HA can be ascertained when compared to other desensitizing molecules (...) n-HA remains an effective desensitizing agent to consider as a therapeutic option in everyday practice." |
