# Supplementary material for: Clinical Evidence of Biomimetic Hydroxyapatite in Oral Care Products for Reducing Dentin Hypersensitivity: An Updated Systematic Review and Meta-Analysis
Source: MDPI journal article supplement (doi:10.3390/biomimetics8010023), 2023-01-06
Supplement: s1 [file s1]

Table S3. Health Canada Approved Hydroxyapatite Toothpastes

| Brand name<br>(Company)                                                                      | Natural Product<br>Number<br>(date of licensing)    | % hydroxyapatite /<br>medicinal ingredients  | Other ingredients                                                                                                                                                                                                                                                                                                                 | Recommended use or purpose /<br>Sub population                                                                                                                                                                                                                                                                                                                   |
|----------------------------------------------------------------------------------------------|-----------------------------------------------------|----------------------------------------------|-----------------------------------------------------------------------------------------------------------------------------------------------------------------------------------------------------------------------------------------------------------------------------------------------------------------------------------|------------------------------------------------------------------------------------------------------------------------------------------------------------------------------------------------------------------------------------------------------------------------------------------------------------------------------------------------------------------|
| X-Pur Remin<br>(Oral Science Inc)                                                            | 80061255<br>(2015-05-27)<br>revised<br>(2021-10-18) | 10%                                          | Carboxymethylcellulose sodium<br>Carrageenan<br>Cetylpyridinium Chloride<br>Ethanol<br>Glycerin<br>Glycyrrhethinic acid<br>Macrogol 400<br>Peppermint Flavour<br>Polyoxyethylene Castor Oil Derivatives<br>Polyvinylpyrrolidone<br>Silicon dioxide<br>Sodium Lauroyl Glutamate<br>Titanium dioxide<br>Water<br>Xylitol<br>Zeolite | Helps remineralize tooth enamel<br>Helps restore minerals to tooth enamel<br>Strengthen teeth by remineralizing enamel<br>Helps to reduce cavities<br>Helps to reduce tooth sensitivity pain<br><br><ul style="list-style-type: none"> <li>children 2-5 yrs</li> <li>children and adolescents 6 – 11 yrs</li> <li>adults and adolescents &gt;= 12 yrs</li> </ul> |
| UltraDex Sensitive<br>Toothpaste<br>(Venture Life Ltd.)                                      | 80081856<br>(2017-12-14)<br>revised<br>(2018-02-17) | 7.5%<br>(+ 1.09% sodium monofluorophosphate) | Aqua<br>C.I. No. 77891<br>Cellulose gum<br>Citric acid<br>Glycerin<br>Hydrated Silica<br>Menthol<br>Sodium bicarbonate<br>Sodium chlorite<br>Sodium citrate<br>Sodium phosphate tribasic dodecahydrate<br>Sodium saccharin<br>Spearmint essential oil<br>d-Limonene<br>l-Limonene                                                 | Helps to rebuild tooth surfaces<br>Provides a protective enamel shield<br>Protects teeth<br>Strengthen teeth by remineralizing enamel<br>Helps rebuild tooth surfaces, to leave teeth stronger<br><br><ul style="list-style-type: none"> <li>adults</li> </ul>                                                                                                   |
| SirinMED Hyper<br>Sensitivie Enamel<br>Protection<br>(Bukwang<br>Pharmaceutical<br>Co. Ltd.) | 80082864<br>(2018-02-05)                            | 19%<br>(+ 2.5% silicon dioxide)              | Allura Red AC<br>Carboxymethylcellulose sodium<br>Fragrance<br>Glycerin<br>Menthol<br>Methylparaben<br>Purified water<br>Saccharin sodium dihydrate<br>Sodium Cocoyl Isethionate<br>Sodium lauryl sulfate                                                                                                                         | Provides clinically shown relief from dentin hypersensitivity pain<br><br><ul style="list-style-type: none"> <li>keep out of children under 6 years of age</li> </ul>                                                                                                                                                                                            |
| Extra Whitening<br>Toothpaste<br>(Green Beaver Co.<br>Ltd.)                                  | 80090492<br>(2019-02-07)<br>revised<br>(2020-11-30) | 4.25%<br>(+ 20.0% xylitol)                   | Aqua<br>Calcium carbonate<br>Carica Papaya (Papaya)<br>Fruit Extract<br>Citrus grandis (grapefruit) seed extract<br>Citrus grandis (grapefruit) seed extract<br>Coco-Glucoside<br>Glycerin<br>Hydrated Silica<br>Maltodextrin<br>Menthol<br>Sorbitol<br>Tea tree essential oil<br>Xanthan Gum                                     | Helps prevent dental cavities<br>Helps prevent plaque formation<br>Helps reduce the risk of tooth decay<br><br><ul style="list-style-type: none"> <li>adults and children minum age 6 years</li> </ul>                                                                                                                                                           |

|                                                        |                                                     |                            |                                                                                                                                                                                                                                                                                                                                                                  |                                                                                                                                                                                                                                                                                                                                                                            |
|--------------------------------------------------------|-----------------------------------------------------|----------------------------|------------------------------------------------------------------------------------------------------------------------------------------------------------------------------------------------------------------------------------------------------------------------------------------------------------------------------------------------------------------|----------------------------------------------------------------------------------------------------------------------------------------------------------------------------------------------------------------------------------------------------------------------------------------------------------------------------------------------------------------------------|
| Enamel Shield<br>Toothpaste<br>(Green Beaver Co. Ltd.) | 80091224<br>(2019-03-14)<br>revised<br>(2020-12-02) | 4.25%<br>(+ 20.0% xylitol) | Aqua<br>Calcium carbonate<br>Carica Papaya (Papaya)<br>Fruit Extract<br>Citrus grandis (grapefruit)<br>seed extract<br>Citrus grandis (grapefruit)<br>seed extract<br>Coco-Glucoside<br>Glycerin<br>Hydrated Silica<br>Maltodextrin<br>Menthol<br>Sorbitol<br>Tea tree essential oil<br>Xanthan Gum                                                              | Provides a protective enamel shield<br>Helps prevent dental cavities<br>Helps prevent plaque formation<br>Helps reduce the risk of tooth decay <ul style="list-style-type: none"> <li>adults and children minimum age 6 years</li> </ul>                                                                                                                                   |
| Apagard Premio<br>(Sangi Co. Ltd.)                     | 80096121<br>(2019-12-16)<br>revised<br>(2021-01-22) | 7.0%                       | Aqua<br>Cellulose gum<br>Cetylpyridinium chloride<br>Dicalcium phosphate<br>Flavour<br>Glycerin<br>Glycyrrhethinic acid<br>Magnesium phosphate, tribasic<br>PEG-8<br>Silica<br>Sodium lauryl sulfate<br>Sodium saccharin<br>Sodium silicate<br>Xylitol                                                                                                           | Helps remineralize tooth enamel<br>Helps restore minerals in tooth enamel<br>Strengthens tooth enamel<br>Helps to reduce cavities <ul style="list-style-type: none"> <li>adolescents 9 to 13 yrs</li> <li>adults and adolescents 15 years min.</li> <li>adults and adolescents 12 years min</li> <li>children 2 to 3 years</li> <li>children 4 to 9 years</li> </ul>       |
| Apadent Total<br>Care<br>(Sangi Co. Ltd.)              | 80096124<br>(2019-12-16)<br>revised<br>(2021-01-22) | 7.0%                       | Aqua<br>Butylene glycol<br>Cellulose gum<br>Cetylpyridinium chloride<br>Chamomilla Recutita (Matricaria) Flower Extract<br>Dicalcium phosphate<br>Ethanol<br>Flavour<br>Glycerin<br>Green tea extract<br>Magnesium phosphate, tribasic<br>PEG-8<br>PVP<br>Sage Leaf Extract<br>Silica<br>Sodium lauroyl sarcosinate<br>Sodium lauryl sulfate<br>Sodium saccharin | Helps remineralize tooth enamel<br>Helps restore minerals in tooth enamel<br>Strengthens tooth enamel<br>Helps to reduce cavities <ul style="list-style-type: none"> <li>adolescents 9 to 13 yrs</li> <li>adults and adolescents 15 years min.</li> <li>adults and adolescents 12 years min</li> <li>children 2 to 3 years</li> <li>children 4 to 9 years</li> </ul>       |
| Kinder Karex<br>(Dr. Kurt Wolff GmbH & Co. KG)         | 80117093<br>(2022-03-12)                            | 10%                        | 1,2-Hexanediol<br>Aqua<br>Caprylyl glycol<br>Cellulose gum<br>Flavour<br>Glycerin<br>Hydrated Silica<br>Hydrogenated Starch<br>Hydrolysate<br>Silica<br>Sodium cocoyl glycinate<br>Sodium methyl cocoyl taurate<br>Sodium sulfate<br>Xylitol                                                                                                                     | Helps prevent (dental) cavities<br>Helps fight (dental) decay<br>Cavity protection<br>Helps remineralize tooth enamel<br>Helps rebuild tooth enamel<br>Helps reinforce tooth enamel<br>Helps prevent tooth enamel mineral loss<br>Helps protect tooth enamel <ul style="list-style-type: none"> <li>all ages children, adolescents and adults, min. age 2 years</li> </ul> |
