# Supplementary material for: Clinical Evidence of Biomimetic Hydroxyapatite in Oral Care Products for Reducing Dentin Hypersensitivity: An Updated Systematic Review and Meta-Analysis
Source: Biomimetics (Basel). 2023 Jan 6;8(1):23. doi: 10.3390/biomimetics8010023 (PMC9844412; doi:10.3390/biomimetics8010023)
Supplement: Supplementary file 1 [file biomimetics-08-00023-s001.zip]

Archive with 4 entries (4 files):
- Supplement TableS3-Limeback_DH_Review-HealthCanadaApprovedHAPtoothpastes.pdf
- Supplement-Limeback_DH_Review-PRISMA-S_Checklist.pdf
- Supplement-TableS1-Limeback_DH_Review-Systematic reviews on DH.pdf
- Supplement-TableS2-Limeback_DH_Review-Search-details.pdf
